# Supplementary material for: A quantitative structure–property study of reorganization energy for known p-type organic semiconductors
Source: Royal Society of Chemistry journal article supplement (doi:10.1039/c8ra07866a), 2018-01-01
Supplement: c8ra07866a1.pdf [file c8ra07866a1.pdf]

Supplementary information for  
"Quantitative Structure-Property Relationship Study of  
Reorganization Energy for *p*-Type Organic  
Semiconductors"

Sule Atahan-Evrenk\*

*TOBB University of Economics and Technology, Faculty of Medicine  
43 Sogutozu Cad. Sogutozu Ankara TURKEY*

E-mail: satahanevrenk@etu.edu.tr

September 19, 2018

**1 Molecular library**

Table 1: The compound set and electronic data.

| Compound                                                                               | Reorganization Energy (meV) | Previous Work                                                                | $\epsilon_n^{homo}$ (eV) | $\epsilon_c^{homo}$ (eV) | IP <sub>adia</sub> (eV) | IP <sub>vert</sub> (eV) | References |
|----------------------------------------------------------------------------------------|-----------------------------|------------------------------------------------------------------------------|--------------------------|--------------------------|-------------------------|-------------------------|------------|
| 1 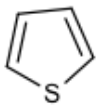    | 403                         | 408 <sup>1</sup>                                                             | -6.35                    | -5.98                    | 8.51                    | 8.71                    |            |
| 2     | 185                         | 178 <sup>2</sup><br>182 <sup>3</sup><br>186 <sup>4</sup><br>189 <sup>5</sup> | -5.80                    | -5.62                    | 7.61                    | 7.70                    | [6]        |
| 3     | 409                         | 410 <sup>7</sup>                                                             | -5.86                    | -5.47                    | 7.66                    | 7.87                    | [8]        |
| 4     | 358                         |                                                                              | -6.06                    | -5.71                    | 7.61                    | 7.80                    |            |
| 5   | 420                         | 365 <sup>9</sup><br>424 <sup>1</sup>                                         | -5.54                    | -5.13                    | 7.12                    | 7.35                    | [9]        |
| 6   | 218                         | 212 <sup>2</sup>                                                             | -5.74                    | -5.53                    | 7.32                    | 7.43                    | [2]        |
| 7   | 138                         | 134 <sup>2</sup><br>138 <sup>4</sup><br>141 <sup>5</sup>                     | -5.24                    | -5.10                    | 6.82                    | 6.89                    | [10]       |
| 8   | 230                         |                                                                              | -5.78                    | -5.55                    | 7.40                    | 7.51                    | [11]       |
| 9   | 288                         |                                                                              | -5.67                    | -5.39                    | 7.27                    | 7.41                    | [11]       |
| 10  | 108                         | 106 <sup>4</sup>                                                             | -5.50                    | -5.39                    | 7.15                    | 7.20                    | [12]       |
| 11  | 165                         | 166 <sup>4</sup>                                                             | -5.48                    | -5.31                    | 7.11                    | 7.19                    | [13]       |

Continued on the next page

| Compound                                                                            | Reorganization Energy (meV) | Previous Work                                            | $\epsilon_n^{homo}$ (eV) | $\epsilon_c^{homo}$ (eV) | IP <sub>adia</sub> (eV) | IP <sub>vert</sub> (eV) | References |
|-------------------------------------------------------------------------------------|-----------------------------|----------------------------------------------------------|--------------------------|--------------------------|-------------------------|-------------------------|------------|
| 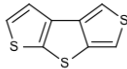   | 193                         |                                                          | -5.51                    | -5.32                    | 7.17                    | 7.26                    | [14]       |
|    | 352                         | 350 <sup>7</sup><br>350 <sup>4</sup>                     | -5.61                    | -5.27                    | 7.20                    | 7.38                    | [15]       |
|    | 209                         |                                                          | -5.53                    | -5.33                    | 7.19                    | 7.29                    | [16]       |
|    | 187                         |                                                          | -5.66                    | -5.48                    | 7.36                    | 7.45                    | [14]       |
|    | 279                         |                                                          | -5.42                    | -5.14                    | 6.87                    | 7.01                    | [17]       |
|    | 165                         | 161 <sup>2</sup>                                         | -5.53                    | -5.36                    | 6.95                    | 7.04                    | [18]       |
|    | 111                         | 109 <sup>2</sup><br>114 <sup>4</sup><br>115 <sup>5</sup> | -4.87                    | -4.76                    | 6.28                    | 6.34                    | [19]       |
|  | 110                         |                                                          | -4.99                    | -4.88                    | 6.42                    | 6.48                    | [20]       |
|  | 243                         |                                                          | -5.56                    | -5.32                    | 6.99                    | 7.11                    | [11]       |
|  | 238                         |                                                          | -5.51                    | -5.28                    | 6.96                    | 7.08                    | [8]        |
|  | 100                         | 100 <sup>4</sup>                                         | -5.10                    | -5.01                    | 6.57                    | 6.62                    | [11]       |
|  | 105                         | 106 <sup>4</sup>                                         | -5.10                    | -5.00                    | 6.56                    | 6.61                    | [11]       |
|  | 280                         |                                                          | -5.67                    | -5.41                    | 7.10                    | 7.24                    | [21]       |
|  | 225                         |                                                          | -5.59                    | -5.37                    | 7.04                    | 7.15                    | [22]       |

Continued on the next page

| Compound                                                                            | Reorganization Energy (meV) | Previous Work                                              | $\epsilon_n^{homo}$ (eV) | $\epsilon_c^{homo}$ (eV) | IP <sub>adia</sub> (eV) | IP <sub>vert</sub> (eV) | References |
|-------------------------------------------------------------------------------------|-----------------------------|------------------------------------------------------------|--------------------------|--------------------------|-------------------------|-------------------------|------------|
| 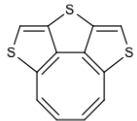   | 378                         |                                                            | -5.02                    | -4.66                    | 6.44                    | 6.63                    | [8]        |
|    | 373                         | 321 <sup>9</sup><br>373 <sup>1</sup>                       | -5.20                    | -4.84                    | 6.50                    | 6.70                    | [9]        |
|    | 145                         | 142 <sup>2</sup>                                           | -4.96                    | -4.83                    | 6.36                    | 6.43                    | [23]       |
|    | 301                         |                                                            | -5.72                    | -5.42                    | 7.19                    | 7.34                    | [8]        |
|    | 326                         | 326 <sup>4</sup><br>330 <sup>7</sup>                       | -5.43                    | -5.11                    | 6.85                    | 7.02                    | [15]       |
|   | 299                         |                                                            | -5.49                    | -5.21                    | 6.79                    | 6.95                    | [8]        |
|  | 302                         |                                                            | -5.59                    | -5.27                    | 6.92                    | 7.08                    | [8]        |
|  | 183                         |                                                            | -5.44                    | -5.25                    | 6.89                    | 6.98                    | [8]        |
|  | 215                         |                                                            | -5.37                    | -5.20                    | 6.71                    | 6.82                    | [8]        |
|  | 185                         | 180 <sup>2</sup><br>180 <sup>24</sup><br>182 <sup>25</sup> | -5.50                    | -5.32                    | 6.81                    | 6.90                    | [26]       |
|  | 168                         | 168 <sup>25</sup>                                          | -5.39                    | -5.23                    | 6.70                    | 6.78                    | [25]       |
|  | 178                         | 178 <sup>12</sup><br>177 <sup>25</sup>                     | -5.33                    | -5.16                    | 6.61                    | 6.70                    | [12]       |

Continued on the next page

| Compound                                                                            | Reorganization Energy (meV) | Previous Work                                                                                               | $\epsilon_n^{homo}$ (eV) | $\epsilon_c^{homo}$ (eV) | IP <sub>adia</sub> (eV) | IP <sub>vert</sub> (eV) | References |
|-------------------------------------------------------------------------------------|-----------------------------|-------------------------------------------------------------------------------------------------------------|--------------------------|--------------------------|-------------------------|-------------------------|------------|
| 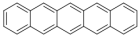   | 93                          | 92 <sup>2</sup> 95 <sup>5</sup><br>98 <sup>4</sup> 91 <sup>24</sup><br>92 <sup>25</sup><br>91 <sup>27</sup> | -4.61                    | -4.52                    | 5.90                    | 5.95                    | [28]       |
|    | 365                         |                                                                                                             | -5.29                    | -4.94                    | 6.56                    | 6.76                    | [8]        |
|    | 256                         |                                                                                                             | -5.61                    | -5.36                    | 7.02                    | 7.14                    | [8]        |
|    | 359                         |                                                                                                             | -5.27                    | -4.92                    | 6.55                    | 6.75                    | [8]        |
|    | 96                          | 92.9 <sup>27</sup>                                                                                          | -4.71                    | -4.61                    | 6.01                    | 6.06                    | [20]       |
|    | 118                         | 116 <sup>25</sup><br>119 <sup>12</sup><br>115 <sup>27</sup>                                                 | -5.42                    | -5.31                    | 6.77                    | 6.83                    | [12]       |
|  | 155                         |                                                                                                             | -5.23                    | -5.08                    | 6.56                    | 6.63                    | [11]       |
|  | 200                         | 204 <sup>12</sup>                                                                                           | -5.35                    | -5.16                    | 6.65                    | 6.75                    | [12]       |
|  | 94                          | 94 <sup>4</sup> 90 <sup>27</sup>                                                                            | -4.81                    | -4.72                    | 6.13                    | 6.18                    | [29]       |
|  | 95                          | 94 <sup>25</sup><br>96 <sup>4</sup> 96 <sup>22</sup><br>91 <sup>27</sup>                                    | -4.81                    | -4.71                    | 6.13                    | 6.18                    | [30]       |
|  | 182                         | 181 <sup>12</sup>                                                                                           | -5.43                    | -5.25                    | 6.76                    | 6.84                    | [12]       |
|  | 134                         |                                                                                                             | -5.27                    | -5.14                    | 6.62                    | 6.68                    | [11]       |
|  | 153                         | 148 <sup>27</sup>                                                                                           | -5.32                    | -5.17                    | 6.66                    | 6.73                    | [31]       |
|  | 117                         | 114 <sup>27</sup>                                                                                           | -5.58                    | -5.46                    | 6.97                    | 7.02                    | [32]       |
|  | 87                          | 82.5 <sup>27</sup>                                                                                          | -5.63                    | -5.55                    | 7.01                    | 7.05                    | [27]       |

Continued on the next page

| Compound                                                                               | Reorganization Energy (meV) | Previous Work                                                                                                           | $\epsilon_n^{homo}$ (eV) | $\epsilon_c^{homo}$ (eV) | IP <sub>adia</sub> (eV) | IP <sub>vert</sub> (eV) | References |
|----------------------------------------------------------------------------------------|-----------------------------|-------------------------------------------------------------------------------------------------------------------------|--------------------------|--------------------------|-------------------------|-------------------------|------------|
| 53 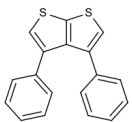   | 266                         |                                                                                                                         | -5.75                    | -5.52                    | 7.12                    | 7.26                    | [8]        |
| 54    | 149                         | 148 <sup>4</sup><br>142 <sup>27</sup>                                                                                   | -5.46                    | -5.32                    | 6.82                    | 6.89                    | [33]       |
| 55    | 118                         | 118 <sup>4</sup><br>119 <sup>25</sup><br>112 <sup>27</sup>                                                              | -5.53                    | -5.41                    | 6.92                    | 6.98                    | [33]       |
| 56    | 208                         |                                                                                                                         | -4.99                    | -4.78                    | 6.21                    | 6.31                    | [17]       |
| 57    | 115                         |                                                                                                                         | -5.24                    | -5.13                    | 6.46                    | 6.52                    | [17]       |
| 58    | 293                         |                                                                                                                         | -5.24                    | -4.96                    | 6.46                    | 6.61                    | [8]        |
| 59    | 231                         | 231 <sup>25</sup><br>221 <sup>27</sup>                                                                                  | -5.42                    | -5.19                    | 6.75                    | 6.86                    | [22]       |
| 60  | 320                         |                                                                                                                         | -5.52                    | -5.19                    | 6.74                    | 6.91                    | [8]        |
| 61  | 362                         |                                                                                                                         | -5.15                    | -4.80                    | 6.33                    | 6.53                    | [8]        |
| 62  | 309                         |                                                                                                                         | -5.62                    | -5.32                    | 6.74                    | 6.90                    | [34]       |
| 63  | 307                         | 306 <sup>22</sup><br>307 <sup>25</sup><br>308 <sup>4</sup><br>310 <sup>7</sup><br>314 <sup>5</sup><br>299 <sup>27</sup> | -5.30                    | -5.00                    | 6.61                    | 6.76                    | [15]       |
| 64  | 318                         |                                                                                                                         | -5.12                    | -4.83                    | 6.28                    | 6.45                    | [35]       |
| 65  | 266                         |                                                                                                                         | -5.39                    | -5.13                    | 6.58                    | 6.72                    | [8]        |
| 66  | 339                         |                                                                                                                         | -5.07                    | -4.75                    | 6.21                    | 6.39                    | [36]       |

Continued on the next page

| Compound                                                                            | Reorganization Energy (meV) | Previous Work                                            | $\epsilon_n^{homo}$ (eV) | $\epsilon_c^{homo}$ (eV) | IP <sub>adia</sub> (eV) | IP <sub>vert</sub> (eV) | References |
|-------------------------------------------------------------------------------------|-----------------------------|----------------------------------------------------------|--------------------------|--------------------------|-------------------------|-------------------------|------------|
| 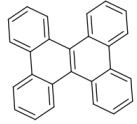   | 193                         |                                                          | -5.31                    | -5.12                    | 6.54                    | 6.63                    | [37]       |
|    | 148                         | 144 <sup>2</sup>                                         | -5.43                    | -5.28                    | 6.64                    | 6.72                    | [2]        |
|    | 79                          | 79 <sup>2</sup>                                          | -4.42                    | -4.34                    | 5.61                    | 5.65                    | [38]       |
|    | 255                         |                                                          | -5.10                    | -4.88                    | 6.37                    | 6.51                    | [39]       |
|    | 348                         | 293 <sup>9</sup><br>345 <sup>1</sup><br>379 <sup>5</sup> | -5.02                    | -4.69                    | 6.14                    | 6.34                    | [1]        |
|    | 85                          |                                                          | -4.50                    | -4.42                    | 5.71                    | 5.75                    | [40]       |
|    | 87                          |                                                          | -4.59                    | -4.50                    | 5.80                    | 5.85                    | [22]       |
|   | 114                         |                                                          | -5.02                    | -4.91                    | 6.27                    | 6.32                    | [31]       |
|  | 196                         |                                                          | -5.33                    | -5.14                    | 6.56                    | 6.65                    | [41]       |
|  | 187                         |                                                          | -5.34                    | -5.15                    | 6.60                    | 6.69                    | [8]        |
|  | 189                         |                                                          | -5.47                    | -5.29                    | 6.68                    | 6.77                    | [41]       |
|  | 130                         | 130 <sup>22</sup><br>134 <sup>5</sup>                    | -5.19                    | -5.06                    | 6.42                    | 6.48                    | [42]       |
|  | 267                         |                                                          | -5.27                    | -5.03                    | 6.45                    | 6.58                    | [43]       |
|  | 252                         |                                                          | -4.97                    | -4.74                    | 6.06                    | 6.18                    | [8]        |
|  | 312                         |                                                          | -5.19                    | -4.91                    | 6.34                    | 6.50                    |            |
|  | 225                         |                                                          | -5.55                    | -5.34                    | 6.76                    | 6.88                    | [44]       |
|  | 212                         |                                                          | -5.57                    | -5.36                    | 6.85                    | 6.96                    | [8]        |

Continued on the next page

| Compound                                                                            | Reorganization Energy (meV) | Previous Work    | $\epsilon_n^{homo}$ (eV) | $\epsilon_c^{homo}$ (eV) | IP <sub>adia</sub> (eV) | IP <sub>vert</sub> (eV) | References |
|-------------------------------------------------------------------------------------|-----------------------------|------------------|--------------------------|--------------------------|-------------------------|-------------------------|------------|
| 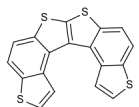   | 211                         |                  | -5.39                    | -5.18                    | 6.66                    | 6.76                    | [8]        |
|    | 320                         |                  | -5.31                    | -5.00                    | 6.52                    | 6.67                    | [17]       |
|    | 103                         |                  | -5.11                    | -5.00                    | 6.23                    | 6.28                    | [45]       |
|    | 328                         |                  | -5.07                    | -4.76                    | 6.19                    | 6.37                    | [46]       |
|    | 291                         | 290 <sup>7</sup> | -5.21                    | -4.93                    | 6.42                    | 6.56                    | [47]       |
|    | 414                         |                  | -4.76                    | -4.36                    | 5.93                    | 6.13                    | [48]       |
|    | 160                         |                  | -4.72                    | -4.58                    | 5.92                    | 6.00                    | [49]       |
|    | 237                         | 245 <sup>5</sup> | -5.19                    | -4.95                    | 6.38                    | 6.50                    | [50]       |
|  | 262                         |                  | -5.30                    | -5.05                    | 6.42                    | 6.55                    | [8]        |
|  | 152                         | 148 <sup>2</sup> | -5.41                    | -5.26                    | 6.55                    | 6.63                    | [2]        |
|  | 281                         |                  | -5.29                    | -5.01                    | 6.39                    | 6.55                    | [8]        |
|  | 264                         |                  | -5.30                    | -5.04                    | 6.41                    | 6.55                    | [51]       |
|  | 230                         |                  | -5.31                    | -5.08                    | 6.42                    | 6.53                    | [52]       |
|  | 288                         |                  | -5.54                    | -5.25                    | 6.54                    | 6.69                    | [34]       |
|  | 79                          |                  | -4.42                    | -4.34                    | 5.55                    | 5.59                    | [22]       |
|  | 103                         |                  | -4.98                    | -4.88                    | 6.14                    | 6.19                    | [31]       |
|  | 372                         |                  | -5.39                    | -5.01                    | 6.50                    | 6.71                    | [53]       |
|  | 337                         |                  | -5.14                    | -4.81                    | 6.22                    | 6.41                    | [54]       |
|  | 253                         |                  | -5.32                    | -5.09                    | 6.41                    | 6.53                    | [55]       |
|  | 155                         |                  | -5.00                    | -4.87                    | 6.18                    | 6.25                    | [55]       |
|  | 116                         |                  | -5.02                    | -4.92                    | 6.23                    | 6.28                    | [55]       |

Continued on the next page



| Compound                                                                            | Reorganization Energy (meV) | Previous Work                        | $\epsilon_n^{homo}$ (eV) | $\epsilon_c^{homo}$ (eV) | IP <sub>adia</sub> (eV) | IP <sub>vert</sub> (eV) | References |
|-------------------------------------------------------------------------------------|-----------------------------|--------------------------------------|--------------------------|--------------------------|-------------------------|-------------------------|------------|
| 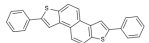   | 232                         |                                      | -5.30                    | -5.09                    | 6.42                    | 6.53                    | [55]       |
|    | 106                         |                                      | -5.50                    | -5.39                    | 6.71                    | 6.76                    | [56]       |
|    | 110                         |                                      | -5.55                    | -5.43                    | 6.75                    | 6.81                    | [56]       |
|    | 292                         |                                      | -5.29                    | -5.02                    | 6.37                    | 6.52                    | [8]        |
|    | 132                         |                                      | -5.21                    | -5.08                    | 6.40                    | 6.47                    | [39]       |
|    | 124                         |                                      | -5.30                    | -5.18                    | 6.51                    | 6.57                    | [32]       |
|    | 179                         |                                      | -5.34                    | -5.16                    | 6.50                    | 6.58                    | [57]       |
|    | 305                         |                                      | -5.26                    | -4.96                    | 6.27                    | 6.43                    | [58]       |
|    | 241                         |                                      | -5.31                    | -5.07                    | 6.43                    | 6.56                    | [59]       |
|   | 309                         | 272 <sup>9</sup><br>314 <sup>1</sup> | -4.90                    | -4.61                    | 5.91                    | 6.07                    | [60]       |
|  | 236                         |                                      | -5.26                    | -5.03                    | 6.39                    | 6.51                    | [57]       |
|  | 308                         |                                      | -5.14                    | -4.83                    | 6.24                    | 6.39                    | [53]       |
|  | 160                         |                                      | -5.58                    | -5.42                    | 6.79                    | 6.87                    | [8]        |
|  | 207                         |                                      | -5.55                    | -5.35                    | 6.77                    | 6.87                    | [8]        |
|  | 210                         |                                      | -5.62                    | -5.42                    | 6.86                    | 6.98                    | [8]        |
|  | 280                         | 280 <sup>4</sup>                     | -5.14                    | -4.87                    | 6.27                    | 6.41                    | [15]       |
|  | 134                         |                                      | -4.98                    | -4.86                    | 6.05                    | 6.12                    | [8]        |
|  | 186                         |                                      | -5.32                    | -5.14                    | 6.42                    | 6.51                    | [61]       |
|  | 181                         |                                      | -5.33                    | -5.15                    | 6.42                    | 6.51                    | [61]       |

Continued on the next page

|     | Compound                                                                            | Reorganization<br>Energy (meV) | Previous<br>Work | $\epsilon_n^{homo}$<br>(eV) | $\epsilon_c^{homo}$<br>(eV) | IP <sub>adia</sub><br>(eV) | IP <sub>vert</sub><br>(eV) | References |
|-----|-------------------------------------------------------------------------------------|--------------------------------|------------------|-----------------------------|-----------------------------|----------------------------|----------------------------|------------|
| 124 | 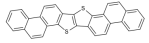   | 181                            |                  | -5.45                       | -5.27                       | 6.53                       | 6.62                       | [61]       |
| 125 |    | 85                             |                  | -4.89                       | -4.81                       | 5.96                       | 6.00                       | [61]       |
| 126 |    | 311                            |                  | -5.19                       | -4.90                       | 6.18                       | 6.34                       | [8]        |
| 127 |    | 290                            |                  | -5.25                       | -4.97                       | 6.32                       | 6.47                       | [8]        |
| 128 |    | 261                            |                  | -5.11                       | -4.87                       | 6.13                       | 6.26                       |            |
| 129 |    | 124                            |                  | -5.12                       | -5.00                       | 6.24                       | 6.30                       | [31]       |
| 130 |    | 242                            |                  | -4.89                       | -4.66                       | 5.97                       | 6.09                       | [17]       |
| 131 |    | 141                            |                  | -5.06                       | -4.93                       | 6.13                       | 6.20                       | [17]       |
| 132 |  | 240                            |                  | -5.10                       | -4.87                       | 6.09                       | 6.22                       | [58]       |
| 133 |  | 232                            |                  | -4.91                       | -4.70                       | 5.89                       | 6.00                       | [8]        |
| 134 |  | 301                            |                  | -4.95                       | -4.67                       | 5.91                       | 6.08                       | [8]        |
| 135 |  | 254                            |                  | -5.49                       | -5.23                       | 6.41                       | 6.53                       | [34]       |
| 136 |  | 257                            |                  | -5.15                       | -4.90                       | 6.15                       | 6.28                       | [8]        |
| 137 |  | 348                            |                  | -4.71                       | -4.37                       | 5.73                       | 5.90                       | [48]       |
| 138 |  | 165                            |                  | -4.70                       | -4.55                       | 5.76                       | 5.84                       | [49]       |
| 139 |  | 300                            |                  | -5.05                       | -4.76                       | 6.00                       | 6.15                       | [8]        |
| 140 |  | 182                            |                  | -4.51                       | -4.35                       | 5.62                       | 5.72                       | [8]        |
| 141 |  | 452                            |                  | -5.22                       | -4.75                       | 6.18                       | 6.43                       | [8]        |
| 142 |  | 309                            |                  | -5.06                       | -4.78                       | 6.02                       | 6.19                       | [62]       |

Continued on the next page

| Compound                                                                                | Reorganization Energy (meV) | Previous Work                        | $\epsilon_n^{homo}$ (eV) | $\epsilon_c^{homo}$ (eV) | IP <sub>adia</sub> (eV) | IP <sub>vert</sub> (eV) | References |
|-----------------------------------------------------------------------------------------|-----------------------------|--------------------------------------|--------------------------|--------------------------|-------------------------|-------------------------|------------|
| 143 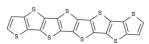   | 268                         |                                      | -5.09                    | -4.83                    | 6.15                    | 6.28                    | [8]        |
| 144    | 232                         |                                      | -4.85                    | -4.64                    | 5.78                    | 5.89                    | [8]        |
| 145    | 323                         |                                      | -5.01                    | -4.71                    | 5.92                    | 6.09                    | [63]       |
| 146    | 287                         |                                      | -5.12                    | -4.84                    | 5.99                    | 6.15                    | [64]       |
| 147    | 76                          |                                      | -5.21                    | -5.14                    | 6.27                    | 6.31                    | [61]       |
| 148    | 140                         |                                      | -4.92                    | -4.79                    | 5.95                    | 6.02                    | [61]       |
| 149    | 123                         |                                      | -5.17                    | -5.05                    | 6.24                    | 6.30                    | [61]       |
| 150    | 270                         |                                      | -5.15                    | -4.89                    | 6.14                    | 6.28                    | [51]       |
| 151    | 145                         |                                      | -5.14                    | -5.01                    | 6.19                    | 6.26                    | [65]       |
| 152    | 108                         |                                      | -5.19                    | -5.08                    | 6.29                    | 6.35                    | [65]       |
| 153    | 258                         | 253 <sup>9</sup><br>301 <sup>1</sup> | -4.81                    | -4.56                    | 5.74                    | 5.87                    | [66]       |
| 154  | 293                         |                                      | -5.11                    | -4.85                    | 6.07                    | 6.23                    | [46]       |
| 155  | 305                         |                                      | -5.12                    | -4.84                    | 6.17                    | 6.33                    | [8]        |
| 156  | 481                         |                                      | -5.11                    | -4.63                    | 6.02                    | 6.28                    | [8]        |
| 157  | 205                         |                                      | -5.29                    | -5.09                    | 6.30                    | 6.40                    | [8]        |
| 158  | 181                         |                                      | -4.69                    | -4.54                    | 5.73                    | 5.82                    | [49]       |
| 159  | 257                         |                                      | -5.02                    | -4.76                    | 5.96                    | 6.08                    | [8]        |
| 160  | 199                         |                                      | -5.22                    | -5.02                    | 6.27                    | 6.37                    | [67]       |
| 161  | 275                         |                                      | -4.99                    | -4.73                    | 5.92                    | 6.06                    | [8]        |
| 162  | 290                         |                                      | -4.88                    | -4.61                    | 5.77                    | 5.94                    | [8]        |
| 163  | 83                          |                                      | -5.04                    | -4.95                    | 5.95                    | 5.99                    | [45]       |

Continued on the next page

| Compound                                                                                | Reorganization Energy (meV) | Previous Work    | $\epsilon_n^{homo}$ (eV) | $\epsilon_c^{homo}$ (eV) | IP <sub>adia</sub> (eV) | IP <sub>vert</sub> (eV) | References |
|-----------------------------------------------------------------------------------------|-----------------------------|------------------|--------------------------|--------------------------|-------------------------|-------------------------|------------|
| 164 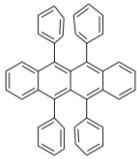   | 147                         | 160 <sup>5</sup> | -4.69                    | -4.56                    | 5.80                    | 5.87                    | [68]       |
| 165    | 301                         |                  | -4.94                    | -4.65                    | 5.81                    | 5.97                    | [8]        |
| 166    | 265                         | 273 <sup>1</sup> | -4.78                    | -4.54                    | 5.63                    | 5.76                    | [15]       |
| 167    | 308                         |                  | -4.72                    | -4.42                    | 5.66                    | 5.81                    | [48]       |
| 168    | 133                         |                  | -5.11                    | -4.98                    | 6.12                    | 6.19                    | [8]        |
| 169    | 363                         |                  | -5.13                    | -4.80                    | 6.12                    | 6.31                    | [8]        |
| 170   | 268                         | 256 <sup>1</sup> | -4.77                    | -4.52                    | 5.54                    | 5.68                    | [9]        |
| 171  | 266                         |                  | -4.67                    | -4.41                    | 5.55                    | 5.68                    | [48]       |

Table 2: Pairwise correlation matrix with Pearson’s correlation coefficient for the RE ( $\lambda$ ) and electronic and structural descriptors.

|                     | $\lambda$ | $E_n$ | $\epsilon_n^{homo}$ | $\epsilon_c^{homo}$ | $\epsilon_n^{lumo}$ | $\epsilon_c^{lumo}$ | $IP_{vert}$ | $QPol_{ave}$ | FsdRing | RotBond | Scount | vdWsa | Rcount |
|---------------------|-----------|-------|---------------------|---------------------|---------------------|---------------------|-------------|--------------|---------|---------|--------|-------|--------|
| $\lambda$           | 1.00      | -0.26 | -0.20               | 0.08                | 0.16                | 0.05                | 0.19        | -0.05        | -0.46   | 0.44    | 0.34   | -0.05 | -0.22  |
| $E_n$               | -0.26     | 1.00  | -0.32               | -0.40               | 0.30                | 0.30                | 0.48        | -0.64        | -0.24   | -0.43   | -0.93  | -0.48 | -0.60  |
| $\epsilon_n^{homo}$ | -0.20     | -0.32 | 1.00                | 0.96                | -0.87               | -0.86               | -0.94       | 0.64         | 0.20    | 0.35    | 0.13   | 0.55  | 0.52   |
| $\epsilon_c^{homo}$ | 0.08      | -0.40 | 0.96                | 1.00                | -0.84               | -0.86               | -0.90       | 0.64         | 0.08    | 0.47    | 0.23   | 0.54  | 0.47   |
| $\epsilon_n^{lumo}$ | 0.16      | 0.30  | -0.87               | -0.84               | 1.00                | 0.99                | 0.85        | -0.65        | -0.31   | -0.24   | -0.10  | -0.50 | -0.57  |
| $\epsilon_c^{lumo}$ | 0.05      | 0.30  | -0.86               | -0.86               | 0.99                | 1.00                | 0.84        | -0.66        | -0.23   | -0.32   | -0.10  | -0.52 | -0.54  |
| $IP_{vert}$         | 0.19      | 0.48  | -0.94               | -0.90               | 0.85                | 0.84                | 1.00        | -0.82        | -0.29   | -0.46   | -0.22  | -0.75 | -0.71  |
| $QPol_{ave}$        | -0.05     | -0.64 | 0.64                | 0.64                | -0.65               | -0.66               | -0.82       | 1.00         | 0.28    | 0.62    | 0.33   | 0.92  | 0.84   |
| FsdRing             | -0.46     | -0.24 | 0.20                | 0.08                | -0.31               | -0.23               | -0.29       | 0.28         | 1.00    | -0.50   | 0.12   | 0.23  | 0.68   |
| RotBond             | 0.44      | -0.43 | 0.35                | 0.47                | -0.24               | -0.32               | -0.46       | 0.62         | -0.50   | 1.00    | 0.26   | 0.65  | 0.21   |
| Scount              | 0.34      | -0.93 | 0.13                | 0.23                | -0.10               | -0.10               | -0.22       | 0.33         | 0.12    | 0.26    | 1.00   | 0.13  | 0.30   |
| vdWsa               | -0.05     | -0.48 | 0.55                | 0.54                | -0.50               | -0.52               | -0.75       | 0.92         | 0.23    | 0.65    | 0.13   | 1.00  | 0.83   |
| Rcount              | -0.22     | -0.60 | 0.52                | 0.47                | -0.57               | -0.54               | -0.71       | 0.84         | 0.68    | 0.21    | 0.30   | 0.83  | 1.00   |

$E_n$ : Total electronic energy,  $\epsilon$ : Molecular orbital energy,  $IP_{vert}$ : Vertical Ionization Potential,  $QPol_{ave}$ : Average polarizability, FsdRing: Fused ring count, RotBond: Rotatable bond count, Scount: Sulfur atom count, vdWsa: van der Waals surface area, Rcount: Ring count Electronic descriptors calculated at the B3LYP/6-31G(d,p) level of theory.

## 2 Molecular transform descriptors

Following Soltzberg and Wilkins, we limit  $s$  into the interval  $[1, 31]$  divided into 100 equal pieces. However, instead of the binary representation they used in which the intervals with  $I(s) = 0$  were coded as “1”, and “0” otherwise, we retained the original  $I(s)$  values. Figure 1 plots the comparison of  $I(s)$  distributions for the pentacene with the DFT and molecular mechanics (MM) geometries.

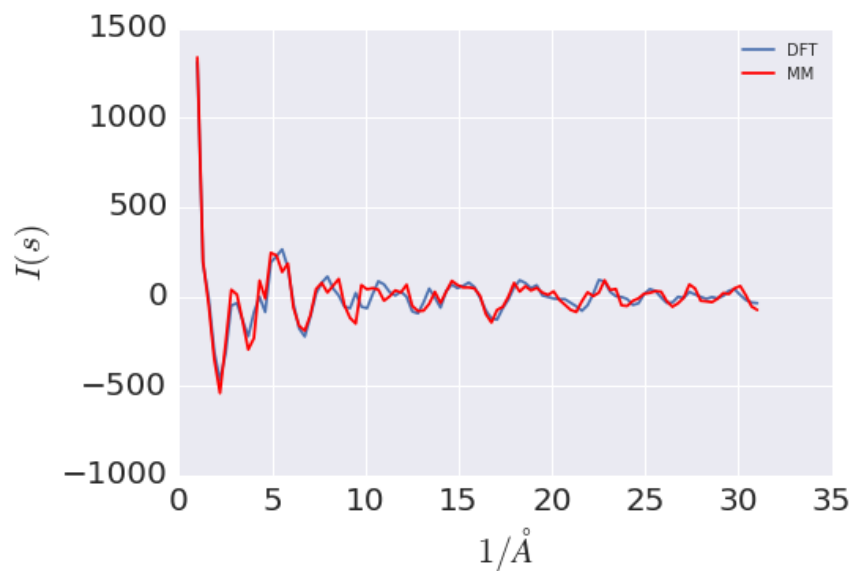

Figure 1: 3D structural descriptor based on the molecular transforms for pentacene with the DFT and MM geometries.

### 3 Principle Components

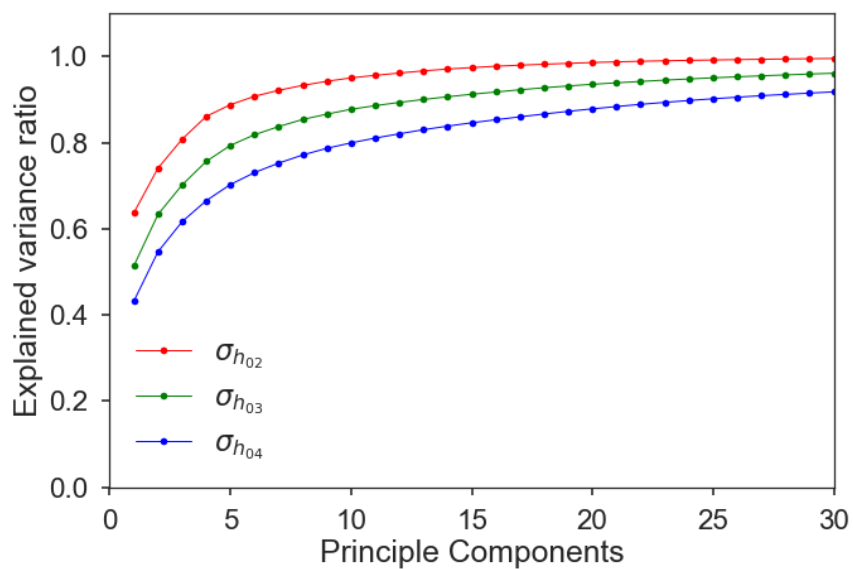

Figure 2: Explained variance ratio by the principle components in the signature (*left*) descriptor spaces

## References

- (1) da Silva Filho, D. A.; Coropceanu, V.; Fichou, D.; Gruhn, N. E.; Bill, T. G.; Gierschner, J.; Cornil, J.; Brédas, J.-L. Hole-vibronic coupling in oligothiophenes: impact of backbone torsional flexibility on relaxation energies. *Philos. Trans. R. Soc., A* **2007**, *365*, 1435–1452.
- (2) Mallocci, G.; Cappellini, G.; Mulas, G.; Mattoni, A. Electronic and optical properties of families of polycyclic aromatic hydrocarbons: A systematic (time-dependent) density functional theory study. *Chem. Phys.* **2011**, *384*, 19 – 27.
- (3) Mallocci, G.; Mulas, G.; Cappellini, G.; Joblin, C. Time-dependent density functional study of the electronic spectra of oligoacenes in the charge states 1, 0, +1, and +2. *Chem. Phys.* **2007**, *340*, 43 – 58.
- (4) Coropceanu, V.; Cornil, J.; Filho, D. S.; A, D.; Olivier, Y.; Silbey, R.; Brédas, J.-L. Charge transport in organic semiconductors. *Chem. Rev* **2007**, *107*, 926–952.
- (5) Yavuz, I.; Martin, B. N.; Park, J.; Houk, K. N. Theoretical Study of the Molecular Ordering, Paracrystallinity, And Charge Mobilities of Oligomers in Different Crystalline Phases. *J. Am. Chem. Soc.* **2015**, *137*, 2856–2866.
- (6) Karl, N. Charge carrier transport in organic semiconductors. *Synthetic Metals* **2003**, *133*, 649 – 657, Proceedings of the Yamada Conference LVI. The Fourth International Symposium on Crystalline Organic Metals, Superconductors and Ferromagnets (ISCOM 2001).
- (7) Zhang, Y.; Cai, X.; Bian, Y.; Li, X.; Jiang, J. Heteroatom Substitution of Oligothiophenes: From Good p-Type Semiconductors to Good Ambipolar Semiconductors for Organic Field-Effect Transistors. *J. Phys. Chem. C* **2008**, *112*, 5148–5159.
- (8) Cinar, M. E.; Ozturk, T. Thienothiophenes, Dithienothiophenes, and Thienoacenes: Syntheses, Oligomers, Polymers, and Properties. *Chem. Rev.* **2015**, *115*, 3036–3140.
- (9) Hutchison, G. R.; Ratner, M. A.; Marks, T. J. Hopping Transport in Conductive Heterocyclic Oligomers: Reorganization Energies and Substituent Effects. *J. Am. Chem. Soc.* **2005**, *127*, 2339–2350.

- (10) Aleshin, A. N.; Lee, J. Y.; Chu, S. W.; Kim, J. S.; Park, Y. W. Mobility studies of field-effect transistor structures based on anthracene single crystals. *Appl. Phys. Lett.* **2004**, *84*, 5383–5385.
- (11) Osaka, I.; Shinamura, S.; Abe, T.; Takimiya, K. Naphthodithiophenes as building units for small molecules to polymers; a case study for in-depth understanding of structure-property relationships in organic semiconductors. *J. Mater. Chem. C* **2013**, *1*, 1297–1304.
- (12) Coropceanu, V.; Kwon, O.; Wex, B.; Kaafarani, B. R.; Gruhn, N. E.; Durivage, J. C.; Neckers, D. C.; Brédas, J.-L. Vibronic Coupling in Organic Semiconductors: The Case of Fused Polycyclic Benzene-Thiophene Structures. *Chem. Eur. J.* **2006**, *12*, 2073–2080.
- (13) Tomoya, K.; Eigo, M.; Kazuo, T. 2,6-Dialkylbenzo[1,2-b:4,5-b']dithiophenes (C<sub>n</sub>-BDTs) as Soluble Organic Semiconductors for Solution-processed Organic Field-effect Transistors. *Chem. Lett.* **2008**, *37*, 284–285.
- (14) Janssen, M. J.; De Jong, F. Synthesis, oxidation, and electronic spectra of four dithienothiophenes. *J. Org. Chem.* **1971**, *36*, 1645–1648.
- (15) Zhang, X.; Cote, A. P.; Matzger, A. J. Synthesis and Structure of Fused alpha-Oligothiophenes with up to Seven Rings. *J. Am. Chem. Soc.* **2005**, *127*, 10502–10503.
- (16) De Jong, F.; Janssen, M. J. Synthesis of dithienothiophenes. *J. Org. Chem.* **1971**, *36*, 1998–2000.
- (17) Kawase, T.; Fujiwara, T.; Kitamura, C.; Konishi, A.; Hirao, Y.; Matsumoto, K.; Kurata, H.; Kubo, T.; Shinamura, S.; Mori, H.; Miyazaki, E.; Takimiya, K. Dinaphthopentalenes: Pentalene Derivatives for Organic Thin-Film Transistors. *Angew. Chem. Int. Ed.* **2010**, *49*, 7728–7732.
- (18) Kunugi, Y.; Ikari, M.; Okamoto, K. Chrysene Derivatives as New Organic Semiconductors for Organic Field-effect Transistors. *ECS Trans.* **2010**, *25*, 11–17.
- (19) Goldmann, C.; Haas, S.; Krellner, C.; Pernstich, K. P.; Gundlach, D. J.; Batlogg, B. Hole



- mobility in organic single crystals measured by a flip-crystal field-effect technique. *J. Appl. Phys.* **2004**, *96*, 2080–2086.
- (20) Tang, M. L.; Okamoto, T.; Bao, Z. High-Performance Organic Semiconductors: Asymmetric Linear Acenes Containing Sulphur. *J. Am. Chem. Soc.* **2006**, *128*, 16002–16003.
- (21) Shinamura, S.; Miyazaki, E.; Takimiya, K. Synthesis, Properties, Crystal Structures, and Semiconductor Characteristics of Naphtho[1,2-b:5,6-b']dithiophene and -diselenophene Derivatives. *J. Org. Chem.* **2010**, *75*, 1228–1234.
- (22) Takimiya, K.; Shinamura, S.; Osaka, I.; Miyazaki, E. Thienoacene-Based Organic Semiconductors. *Adv. Mater.* **2011**, *23*, 4347–4370.
- (23) Kim, S. H.; Yang, Y. S.; Lee, J. H.; Lee, J.-I.; Chu, H. Y.; Lee, H.; Oh, J.; Do, L.-M.; Zyung, T. Organic field-effect transistors using perylene. *Opt. Mater.* **2003**, *21*, 439 – 443.
- (24) Nguyen, T. P.; Shim, J. H.; Lee, J. Y. Density Functional Theory Studies of Hole Mobility in Picene and Pentacene Crystals. *J. Phys. Chem. C* **2015**, *119*, 11301–11310.
- (25) Mamada, M.; Yamashita, Y. *Polycyclic Arenes and Heteroarenes*; Wiley-VCH Verlag GmbH & Co. KGaA, 2015; pp 277–308.
- (26) Okamoto, H.; Kawasaki, N.; Kaji, Y.; Kubozono, Y.; Fujiwara, A.; Yamaji, M. Air-assisted High-performance Field-effect Transistor with Thin Films of Picene. *J. Am. Chem. Soc.* **2008**, *130*, 10470–10471.
- (27) Zhu, R.; Duan, Y.-A.; Geng, Y.; Wei, C.-Y.; Chen, X.-Y.; Liao, Y. Theoretical evaluation on the reorganization energy of five-ring-fused benzothiophene derivatives. *Comp. Theor. Chem.* **2016**, *1078*, 16–22.
- (28) Knipp, D.; Street, R. A.; Völkel, A.; Ho, J. Pentacene thin film transistors on inorganic dielectrics: Morphology, structural properties, and electronic transport. *J. Appl. Phys.* **2003**, *93*, 347–355.

- (29) Lehnherr, D.; Waterloo, A. R.; Goetz, K. P.; Payne, M. M.; Hampel, F.; Anthony, J. E.; Jurchescu, O. D.; Tykwinski, R. R. Isomerically Pure syn-Anthradithiophenes: Synthesis, Properties, and FET Performance. *Org. Lett.* **2012**, *14*, 3660–3663.
- (30) Laquindanum, J. G.; Katz, H. E.; Lovinger, A. J. Synthesis, Morphology, and Field-Effect Mobility of Anthradithiophenes. *J. Am. Chem. Soc.* **1998**, *120*, 664–672.
- (31) Mori, T.; Nishimura, T.; Yamamoto, T.; Doi, I.; Miyazaki, E.; Osaka, I.; Takimiya, K. Consecutive Thiophene-Annulation Approach to  $\pi$ -Extended Thienoacene-Based Organic Semiconductors with [1]Benzothieno[3,2-b][1]benzothiophene (BTBT) Substructure. *J. Am. Chem. Soc.* **2013**, *135*, 13900–13913.
- (32) Liu, W.-J.; Zhou, Y.; Ma, Y.; Cao, Y.; Wang, J.; Pei, J. Thin Film Organic Transistors from Air-Stable Heteroarenes: Anthra[1,2-b:4,3-b':5,6-b'':8,7-b''']tetrathiophene Derivatives. *Org. Lett.* **2007**, *9*, 4187–4190.
- (33) Wex, B.; Kaafarani, B. R.; Schroeder, R.; Majewski, L. A.; Burckel, P.; Grell, M.; Neckers, D. C. New organic semiconductors and their device performance as a function of thiophene orientation. *J. Mater. Chem.* **2006**, *16*, 1121–1124.
- (34) Gundlach, D. J.; Lin, Y.-Y.; Jackson, T. N.; Schlom, D. G. Oligophenyl-based organic thin film transistors. *Appl. Phys. Lett.* **1997**, *71*, 3853–3855.
- (35) Katz, H. E.; Lovinger, A. J.; Hong, X. M.; Dodabalapur, A.; Johnson, J.; Wang, B.-C.; Raghavachari, K. Design of organic transistor semiconductors for logic elements, displays, and sensors. *Proc. SPIE* **2001**, *4466*, 20–30.
- (36) Funahashi, M.; Kato, T. Design of liquid crystals: from a nematogen to thiophene-based  $\pi$ -conjugated mesogens. *Liq. Cryst.* **2015**, *42*, 909–917.
- (37) Ueda, Y.; Tsuji, H.; Tanaka, H.; Nakamura, E. Synthesis, Crystal Packing, and Ambipolar Carrier Transport Property of Twisted Dibenzo[g,p]chrysenes. *Chem. - Asian J* **2014**, *9*, 1623–1628.

- (38) Watanabe, M.; Chang, Y. J.; Liu, S.-W.; Chao, T.-H.; Goto, K.; Minarul, I.; Yuan, C.-H.; Tao, Y.-T.; Shinmyozu, T.; Chow, T. J. The synthesis, crystal structure and charge-transport properties of hexacene. *Nat Chem* **2012**, *4*, 574–578.
- (39) Brusso, J. L.; Hirst, O. D.; Dadvand, A.; Ganesan, S.; Cicoira, F.; Robertson, C. M.; Oakley, R. T.; Rosei, F.; Perepichka, D. F. Two-Dimensional Structural Motif in Thienoacene Semiconductors: Synthesis, Structure, and Properties of Tetrathienoanthracene Isomers. *Chem. Mater.* **2008**, *20*, 2484–2494.
- (40) Tang, M. L.; Mannsfeld, S. C. B.; Sun, Y.-S.; Becerril, H. A.; Bao, Z. Pentaceno[2,3-b]thiophene, a Hexacene Analogue for Organic Thin Film Transistors. *J. Am. Chem. Soc.* **2009**, *131*, 882–883.
- (41) Yamamoto, T.; Shinamura, S.; Miyazaki, E.; Takimiya, K. Three Structural Isomers of Dinaphthothieno[3,2-b]thiophenes: Elucidation of Physicochemical Properties, Crystal Structures, and Field-Effect Transistor Characteristics. *Bull. Chem. Soc. Jpn.* **2010**, *83*, 120–130.
- (42) Yamamoto, T.; Takimiya, K. Facile Synthesis of Highly  $\pi$ -Extended Heteroarenes, Dinaphtho[2,3-b:2',3'-f]chalcogenopheno[3,2-b]chalcogenophenes, and Their Application to Field-Effect Transistors. *J. Am. Chem. Soc.* **2007**, *129*, 2224.
- (43) Takimiya, K.; Kunugi, Y.; Konda, Y.; Niihara, N.; Otsubo, T. 2,6-Diphenylbenzo[1,2-b:4,5-b']dichalcogenophenes: A New Class of High-Performance Semiconductors for Organic Field-Effect Transistors. *J. Am. Chem. Soc.* **2004**, *126*, 5084–5085.
- (44) Shi, J.; Li, Y.; Jia, M.; Xu, L.; Wang, H. Organic semiconductors based on annelated [small beta]-oligothiophenes and its application for organic field-effect transistors. *J. Mater. Chem.* **2011**, *21*, 17612–17614.
- (45) Ito, K.; Suzuki, T.; Sakamoto, Y.; Kubota, D.; Inoue, Y.; Sato, F.; Tokito, S. Oligo(2,6-anthrylene)s: Acene-Oligomer Approach for Organic Field-Effect Transistors. *Angew. Chem. Int. Ed.* **2003**, *42*, 1159–1162.

- (46) Sun, Y.; Ma, Y.; Liu, Y.; Lin, Y.; Wang, Z.; Wang, Y.; Di, C.; Xiao, K.; Chen, X.; Qiu, W.; Zhang, B.; Yu, G.; Hu, W.; Zhu, D. High-Performance and Stable Organic Thin-Film Transistors Based on Fused Thiophenes. *Adv. Funct. Mater.* **2006**, *16*, 426–432.
- (47) Liu, Y.; Sun, X.; Di, C.-a.; Liu, Y.; Du, C.; Lu, K.; Ye, S.; Yu, G. Hexathienoacene: Synthesis, Characterization, and Thin-Film Transistors. *Chem. - Asian J.* **2010**, *5*, 1550–1554.
- (48) Dai, G.; Chang, J.; Shi, X.; Zhang, W.; Zheng, B.; Huang, K.-W.; Chi, C. Thienoacene-Fused Pentalenes: Syntheses, Structures, Physical Properties and Applications for Organic Field-Effect Transistors. *Chem. - Eur. J.* **2015**, *21*, 2019–2028.
- (49) Yoshihito, K.; Kazuo, T.; Kazuo, Y.; Yoshio, A.; Tetsuo, O. Organic Field-Effect Transistors Using Di(2-thienyl)naphthodithiophenes as Active Layers. *Chem. Lett.* **2002**, *31*, 958–959.
- (50) Afonina, I.; Skabara, P. J.; Vilela, F.; Kanibolotsky, A. L.; Forgie, J. C.; Bansal, A. K.; Turnbull, G. A.; Samuel, I. D. W.; Labram, J. G.; Anthopoulos, T. D.; Coles, S. J.; Hursthouse, M. B. Synthesis and characterisation of new diindenodithienothiophene (DITT) based materials. *J. Mater. Chem.* **2010**, *20*, 1112–1116.
- (51) Huang, P.-Y.; Chen, L.-H.; Kim, C.; Chang, H.-C.; Liang, Y.-j.; Feng, C.-Y.; Yeh, C.-M.; Ho, J.-C.; Lee, C.-C.; Chen, M.-C. High-Performance Bottom-Contact Organic Thin-Film Transistors Based on Benzo[d,d']thieno[3,2-b;4,5-b']dithiophenes (BTDTs) Derivatives. *ACS Appl. Mater. Interfaces* **2012**, *4*, 6992–6998.
- (52) Laquindanum, J. G.; Katz, H. E.; Lovinger, A. J.; Dodabalapur, A. Benzodithiophene Rings as Semiconductor Building Blocks. *Adv. Mater.* **1997**, *9*, 36–39.
- (53) Tan, L.; Zhang, L.; Jiang, X.; Yang, X.; Wang, L.; Wang, Z.; Li, L.; Hu, W.; Shuai, Z.; Li, L.; Zhu, D. A Densely and Uniformly Packed Organic Semiconductor Based on Annelated beta-Trithiophenes for High-Performance Thin Film Transistors. *Adv. Funct. Mater.* **2009**, *19*, 272–276.
- (54) Bao, Z.; A. Rogers, J.; E. Katz, H. Printable organic and polymeric semiconducting materials and devices. *J. Mater. Chem.* **1999**, *9*, 1895–1904.

- (55) Shinamura, S.; Osaka, I.; Miyazaki, E.; Nakao, A.; Yamagishi, M.; Takeya, J.; Takimiya, K. Linear- and Angular-Shaped Naphthodithiophenes: Selective Synthesis, Properties, and Application to Organic Field-Effect Transistors. *J. Am. Chem. Soc.* **2011**, *133*, 5024–5035.
- (56) Sirringhaus, H.; Friend, R. H.; Wang, C.; Leuninger, J.; Mullen, K. Dibenzothienobisbenzothiophene—a novel fused-ring oligomer with high field-effect mobility. *J. Mater. Chem.* **1999**, *9*, 2095–2101.
- (57) Seok, Y. Y.; Takuma, Y.; Chihaya, A. Organic Single-Crystal Transistors Based on  $\pi$ -Extended Heteroheptacene Microribbons. *Bull. Chem. Soc. Jpn.* **2012**, *85*, 1186–1191.
- (58) Kim, H.-S.; Kim, Y.-H.; Kim, T.-H.; Noh, Y.-Y.; Pyo, S.; Yi, M. H.; Kim, D.-Y.; Kwon, S.-K. Synthesis and Studies on 2-Hexylthieno[3,2-b]thiophene End-Capped Oligomers for OTFTs. *Chem. Mater.* **2007**, *19*, 3561–3567.
- (59) Okamoto, T.; Kudoh, K.; Wakamiya, A.; Yamaguchi, S. General Synthesis of Thiophene and Selenophene-Based Heteroacenes. *Org. Lett.* **2005**, *7*, 5301–5304.
- (60) Tasaka, S.; Katz, H.; Hutton, R.; Orenstein, J.; Fredrickson, G.; Wang, T. Electrical conductivity of  $\alpha$ -quinquethiophene/stearic acid Langmuir-Blodgett films doped with iodine. *Synth. Met.* **1986**, *16*, 17 – 30.
- (61) Sokolov, A. N.; Atahan-Evrenk, S.; Mondal, R.; Akkerman, H. B.; Sánchez-Carrera, R. S.; Granados-Focil, S.; Schrier, J.; Mannsfeld, S. C. B.; Zoombelt, A. P.; Bao, Z.; Aspuru-Guzik, A. From computational discovery to experimental characterization of a high hole mobility organic crystal. *Nat. Commun.* **2011**, *2*, 437–8.
- (62) Yanagi, H.; Araki, Y.; Ohara, T.; Hotta, S.; Ichikawa, M.; Taniguchi, Y. Comparative Carrier Transport Characteristics in Organic Field-Effect Transistors with Vapor-Deposited Thin Films and Epitaxially Grown Crystals of Biphenyl-Capped Thiophene Oligomers. *Adv. Funct. Mater.* **2003**, *13*, 767–773.
- (63) Facchetti, A.; Yoon, M.-H.; Katz, H. E.; Marks, T. J. Materials for n-type organic electronics: synthesis and properties of fluoroarene-thiophene semiconductors. 2003.

- (64) Yoon, M.-H.; Facchetti, A.; Stern, C. E.; Marks, T. J. Fluorocarbon-Modified Organic Semiconductors: Molecular Architecture, Electronic, and Crystal Structure Tuning of Arene- versus Fluoroarene-Thiophene Oligomer Thin-Film Properties. *J. Am. Chem. Soc.* **2006**, *128*, 5792–5801.
- (65) Kang, M. J.; Miyazaki, E.; Osaka, I.; Takimiya, K.; Nakao, A. Diphenyl Derivatives of Dinaphtho[2,3-b:2',3'-f]thieno[3,2-b]thiophene: Organic Semiconductors for Thermally Stable Thin-Film Transistors. *ACS Appl. Mater. Interfaces* **2013**, *5*, 2331–2336.
- (66) Peng, X.; Horowitz, G.; Fichou, D.; Garnier, F. All-organic thin-film transistors made of alpha-sexithienyl semiconducting and various polymeric insulating layers. *Appl. Phys. Lett.* **1990**, *57*, 2013.
- (67) Zhang, S.; Guo, Y.; Zhang, Y.; Liu, R.; Li, Q.; Zhan, X.; Liu, Y.; Hu, W. Synthesis, self-assembly, and solution-processed nanoribbon field-effect transistor of a fused-nine-ring thienoacene. *Chem. Commun.* **2010**, *46*, 2841–2843.
- (68) Podzorov, V.; Sysoev, S.; Loginova, E.; Pudalov, V.; Gershenson, M. Single-crystal organic field effect transistors with the hole mobility  $\approx 8 \text{ cm}^2/\text{Vs}$ . *Appl. Phys. Lett.* **2003**, *83*, 3504.
